# Supplementary material
Source: MDPI journal article supplement (https://www.mdpi.com/1099-4300/25/5/806)
Supplement: s1 [file s1]

## Supplementary Materials

joint pdf of  $x_1$  &  $x_2$  at time 1.0

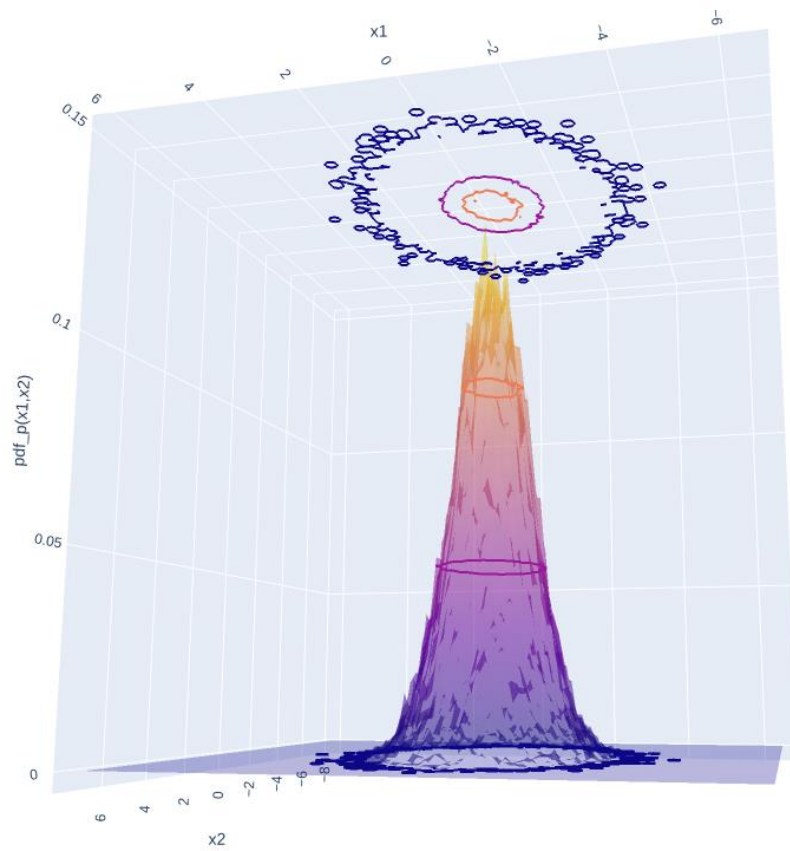

**Figure S1.** Estimation of the joint probability distribution via histogram.
